# Supplementary material
Source: publisher site journal article supplement (http://static.cambridge.org/content/id/urn:cambridge.org:id:article:S1355617719000894/resource/name/S1355617719000894supp001.docx)
Supplement: Supplementary file 1 [file S1355617719000894supp001.docx]

**Embase.com**

('migrant'/exp OR 'ethnic group'/de OR 'minority group'/exp OR 'ethnic or racial aspects'/exp OR 'transcultural care'/exp OR 'religious group'/de OR 'Asian continental ancestry group'/de OR Buddhist/de OR Hindu/de OR Muslim/exp OR 'Hispanic'/exp OR 'Black person'/exp OR 'Surinamese'/exp OR Moroccan/de OR 'Turkish citizen'/de OR 'Turkic people'/exp OR 'indigenous people'/exp OR 'cultural sensitivity'/exp OR 'cultural psychology'/de OR 'cultural factor'/exp OR anthropology/exp OR (migrant* OR immigra* OR refugee* OR ethnic* OR minorit* OR ((cultur* OR linguist*) NEAR/3 (divers* OR cross OR factor* OR psychol*)) OR crosscult* OR ethnic* OR race OR racial* OR cultur* OR transcultur* OR ethno* OR morocc* OR turk* OR muslim* OR Buddhist* OR Hindu* OR arab* OR asian OR mediterran* OR sociolinguis* OR hispanic* OR (american* NEAR/3 (african* OR mexican*)) OR Surinam* OR anthropolog* OR indigen* OR (native NEAR/3 (american* OR born OR people*)) OR aborigin* OR ethnopsychol*):ab,ti) AND ('neuropsychology'/exp OR 'neuropsychological test'/exp OR 'cognitive defect'/exp OR 'mild cognitive impairment'/exp OR 'mental test'/exp OR 'aphasia'/de OR 'agnosia'/de OR 'apraxia'/de OR 'orientation'/de OR 'spatial orientation'/de OR 'depth perception'/de OR 'mental concentration'/de OR (neuropsych* OR neurodegenerat* OR ((cogniti* OR neurocognit*) NEAR/3 (impair* OR handicap* OR defect* OR disorder* OR assess* OR test* OR disabilit* OR degenerat* OR function* OR dysfunction*)) OR dement* OR alzheimer* OR (psycholog* NEAR/3 tool*) OR ((memor* OR attention* OR executive-function* OR language* OR perception* OR visu*-construct*) NEAR/3 test*) OR aphasi* OR agnos* OR apraxi* OR orientation OR ((depth OR visuospaci*) NEAR/3 perception) OR (mental* NEAR/3 (concentrat* OR speed)) OR (processing NEAR/3 speed)):ab,ti) AND ('diagnostic test'/exp OR 'diagnostic procedure' 'neuropsychological test'/exp OR 'diagnostic accuracy'/de OR (((diagnos* OR neuropsych* OR detect*) NEAR/3 (assess* OR test* OR procedure* OR accura* OR validit* OR reliab*))):ab,ti OR (((memor* OR attention* OR executive-function* OR language* OR perception* OR visu*-construct*) NEAR/3 test*)):ab,ti ) NOT ((juvenile/exp OR (child* OR pediatr* OR infan* OR adolescen*):ab,ti) NOT (adult/exp OR (adult* OR elderl*):ab,ti)) NOT ([Conference Abstract]/lim)

**Medline Ovid**

("Transients and Migrants"/ OR exp Ethnic Groups/ OR Minority Groups/ OR Ethnopsychology/ OR Cross-Cultural Comparison/ OR Religion/ OR exp Asian Continental Ancestry Group/ OR Buddhism/ OR Hinduism/ OR islam/ OR exp African Continental Ancestry Group/ OR Oceanic Ancestry Group/ OR exp anthropology/ OR (migrant* OR immigra* OR refugee* OR ethnic* OR minorit* OR ((cultur* OR linguist*) ADJ3 (divers* OR cross OR factor* OR psychol*)) OR crosscult* OR ethnic* OR race OR racial* OR cultur* OR transcultur* OR ethno* OR morocc* OR turk* OR muslim* OR Buddhist* OR Hindu* OR arab* OR asian OR mediterran* OR sociolinguis* OR hispanic* OR (american* ADJ3 (african* OR mexican*)) OR Surinam* OR anthropolog* OR indigen* OR (native ADJ3 (american* OR born OR people*)) OR aborigin* OR ethnopsychol*).ab,ti.) AND (Neuropsychology/ OR Neuropsychological Tests/ OR Stroop Test/ OR Trail Making Test/ OR Cognitive Dysfunction/ OR aphasia/ OR agnosia/ OR apraxias/ OR orientation/ OR Orientation, Spatial/ OR Depth Perception/ OR Attention/ OR (neuropsych* OR neurodegenerat* OR ((cogniti* OR neurocognit*) ADJ3 (impair* OR handicap* OR defect* OR disorder* OR assess* OR test* OR disabilit* OR degenerat* OR function* OR dysfunction*)) OR dement* OR alzheimer* OR (psycholog* ADJ3 tool*) OR ((memor* OR attention* OR executive-function* OR language* OR perception* OR visu*-construct*) ADJ3 test*) OR aphasi* OR agnos* OR apraxi* OR orientation OR ((depth OR visuospaci*) ADJ3 perception) OR (mental* ADJ3 (concentrat* OR speed)) OR (processing ADJ3 speed)).ab,ti.) AND (Diagnostic Techniques and Procedures/ OR Diagnostic Tests, Routine/ OR (((diagnos* OR neuropsych* OR detect*) ADJ3 (assess* OR test* OR procedure* OR accura* OR validit* OR reliab*))).ab,ti. OR (((memor* OR attention* OR executive-function* OR language* OR perception* OR visu*-construct*) ADJ3 test*)).ab,ti. ) NOT ((exp child/ OR exp infant/ OR adolescent/ OR (child* OR pediatr* OR infan* OR adolescen*).ab,ti.) NOT (exp adult/ OR (adult* OR elderl*).ab,ti.))

**PsycINFO Ovid**

(Immigration/ OR exp "Racial and Ethnic Groups"/ OR Minority Groups/ OR Ethnology/ OR Cross Cultural Differences/ OR Religion/ OR exp Asians/ OR Buddhism/ OR Hinduism/ OR islam/ OR exp Blacks/ OR exp anthropology/ OR (migrant* OR immigra* OR refugee* OR ethnic* OR minorit* OR ((cultur* OR linguist*) ADJ3 (divers* OR cross OR factor* OR psychol*)) OR crosscult* OR ethnic* OR race OR racial* OR cultur* OR transcultur* OR ethno* OR morocc* OR turk* OR muslim* OR Buddhist* OR Hindu* OR arab* OR asian OR mediterran* OR sociolinguis* OR hispanic* OR (american* ADJ3 (african* OR mexican*)) OR Surinam* OR anthropolog* OR indigen* OR (native ADJ3 (american* OR born OR people*)) OR aborigin* OR ethnopsychol*).ab,ti.) AND (Neuropsychology/ OR Neuropsychological Assessment/ OR Stroop Color Word Test/ OR Cognitive Impairment/ OR aphasia/ OR agnosia/ OR apraxia/ OR perceptual orientation/ OR "Spatial Orientation (perception)"/ OR Depth Perception/ OR Attention/ OR (neuropsych* OR neurodegenerat* OR ((cogniti* OR neurocognit*) ADJ3 (impair* OR handicap* OR defect* OR disorder* OR assess* OR test* OR disabilit* OR degenerat* OR function* OR dysfunction*)) OR dement* OR alzheimer* OR (psycholog* ADJ3 tool*) OR ((memor* OR attention* OR executive-function* OR language* OR perception* OR visu*-construct*) ADJ3 test*) OR aphasi* OR agnos* OR apraxi* OR orientation OR ((depth OR visuospaci*) ADJ3 perception) OR (mental* ADJ3 (concentrat* OR speed)) OR (processing ADJ3 speed)).ab,ti.) AND (Screening Tests/ OR (((diagnos* OR neuropsych* OR detect*) ADJ3 (assess* OR test* OR procedure* OR accura* OR validit* OR reliab*))).ab,ti. OR (((memor* OR attention* OR executive-function* OR language* OR perception* OR visu*-construct*) ADJ3 test*)).ab,ti. ) NOT ((100.ag. OR 200.ag. OR (child* OR pediatr* OR infan* OR adolescen*).ab,ti.) NOT (300.ag. OR (adult* OR elderl*).ab,ti.)) NOT (book* OR chapter*).pt.

**Cochrane CENTRAL**

((migrant* OR immigra* OR refugee* OR ethnic* OR minorit* OR ((cultur* OR linguist*) NEAR/3 (divers* OR cross OR factor* OR psychol*)) OR crosscult* OR ethnic* OR race OR racial* OR cultur* OR transcultur* OR ethno* OR morocc* OR turk* OR muslim* OR Buddhist* OR Hindu* OR arab* OR asian OR mediterran* OR sociolinguis* OR hispanic* OR (american* NEAR/3 (african* OR mexican*)) OR Surinam* OR anthropolog* OR indigen* OR (native NEAR/3 (american* OR born OR people*)) OR aborigin* OR ethnopsychol*):ab,ti) AND ((neuropsych* OR neurodegenerat* OR ((cogniti* OR neurocognit*) NEAR/3 (impair* OR handicap* OR defect* OR disorder* OR assess* OR test* OR disabilit* OR degenerat* OR function* OR dysfunction*)) OR dement* OR alzheimer* OR (psycholog* NEAR/3 tool*) OR ((memor* OR attention* OR executive-function* OR language* OR perception* OR visu*-construct*) NEAR/3 test*) OR aphasi* OR agnos* OR apraxi* OR orientation OR ((depth OR visuospaci*) NEAR/3 perception) OR (mental* NEAR/3 (concentrat* OR speed)) OR (processing NEAR/3 speed)):ab,ti) AND ((((diagnos* OR neuropsych* OR detect*) NEAR/3 (assess* OR test* OR procedure* OR accura* OR validit* OR reliab*))):ab,ti OR (((memor* OR attention* OR executive-function* OR language* OR perception* OR visu*-construct*) NEAR/3 test*)):ab,ti ) NOT (((child* OR pediatr* OR infan* OR adolescen*):ab,ti) NOT ((adult* OR elderl*):ab,ti))

**Web of science**

TS=(((migrant* OR immigra* OR refugee* OR ethnic* OR minorit* OR ((cultur* OR linguist*) NEAR/2 (divers* OR cross OR factor* OR psychol*)) OR crosscult* OR ethnic* OR race OR racial* OR cultur* OR transcultur* OR ethno* OR morocc* OR turk* OR muslim* OR Buddhist* OR Hindu* OR arab* OR asian OR mediterran* OR sociolinguis* OR hispanic* OR (american* NEAR/2 (african* OR mexican*)) OR Surinam* OR anthropolog* OR indigen* OR (native NEAR/2 (american* OR born OR people*)) OR aborigin* OR ethnopsychol*)) AND ((neuropsych* OR neurodegenerat* OR ((cogniti* OR neurocognit*) NEAR/2 (impair* OR handicap* OR defect* OR disorder* OR assess* OR test* OR disabilit* OR degenerat* OR function* OR dysfunction*)) OR dement* OR alzheimer* OR (psycholog* NEAR/2 tool*) OR ((memor* OR attention* OR executive-function* OR language* OR perception* OR visu*-construct*) NEAR/2 test*) OR aphasi* OR agnos* OR apraxi* OR orientation OR ((depth OR visuospaci*) NEAR/2 perception) OR (mental* NEAR/2 (concentrat* OR speed)) OR (processing NEAR/2 speed))) AND ((((diagnos* OR neuropsych* OR detect*) NEAR/2 (assess* OR test* OR procedure* OR accura* OR validit* OR reliab*))) OR (((memor* OR attention* OR executive-function* OR language* OR perception* OR visu*-construct*) NEAR/2 test*)) ) NOT (((child* OR pediatr* OR infan* OR adolescen*)) NOT ((adult* OR elderl*))) ) AND DT=(article) AND LA=(english)

**Google scholar**

immigrants|ethnic|ethnicity|minority neuropsychology| neuropsychological| "cognitive|neurocognitive impairment|handicap|defect|disorder|assessment|test|disability |functioning|dysfunctioning" "diagnostic assessment|test|procedure|accuracy"
